# Supplementary material for: Mathematical model of PAR1-mediated activation of human platelets
Source: Royal Society of Chemistry journal article supplement (doi:10.1039/c0mb00250j), 2011-01-12
Supplement: c0mb00250j.pdf [file c0mb00250j.pdf]

| Parameter                                                           | Purkinje Cells                      | Platelets                            | Description                                           |
|---------------------------------------------------------------------|-------------------------------------|--------------------------------------|-------------------------------------------------------|
| $c_0$                                                               | 2.0 $\mu\text{M}$                   | 2.0 $\mu\text{M}$                    | Total $[\text{Ca}]^{2+}$ in terms of cytosolic volume |
| $c_1$                                                               | 0.185                               | 0.185                                | (ER volume/cytosolic volume)                          |
| $v_1$                                                               | 6 $\text{s}^{-1}$                   | 6 $\text{s}^{-1}$                    | Max $\text{Ca}^{2+}$ channel flux                     |
| $v_2$                                                               | 0.11 $\text{s}^{-1}$                | 0.11 $\text{s}^{-1}$                 | $\text{Ca}^{2+}$ leak flux constant                   |
| $v_3$                                                               | 0.9 $\mu\text{Ms}^{-1}$             | 0.9 $\mu\text{Ms}^{-1}$              | Max $\text{Ca}^{2+}$ uptake                           |
| $k_3$                                                               | 0.1 $\mu\text{M}$                   | 0.1 $\mu\text{M}$                    | Activation constant for ATP- $\text{Ca}^{2+}$ pump    |
| <i>Receptor binding constants</i>                                   |                                     |                                      |                                                       |
| $a_1$                                                               | 400 $\mu\text{M}^{-1}\text{s}^{-1}$ | 4000 $\mu\text{M}^{-1}\text{s}^{-1}$ | IP3                                                   |
| $a_2$                                                               | 0.2 $\mu\text{M}^{-1}\text{s}^{-1}$ | 2 $\mu\text{M}^{-1}\text{s}^{-1}$    | $\text{Ca}^{2+}$ (inhibition)                         |
| $a_3$                                                               | 400 $\mu\text{M}^{-1}\text{s}^{-1}$ | 4000 $\mu\text{M}^{-1}\text{s}^{-1}$ | IP3                                                   |
| $a_4$                                                               | 0.2 $\mu\text{M}^{-1}\text{s}^{-1}$ | 2 $\mu\text{M}^{-1}\text{s}^{-1}$    | $\text{Ca}^{2+}$ (inhibition)                         |
| $a_5$                                                               | 20 $\mu\text{M}^{-1}\text{s}^{-1}$  | 200 $\mu\text{M}^{-1}\text{s}^{-1}$  | $\text{Ca}^{2+}$ (activation)                         |
| <i>Receptor dissociation constants (<math>d_i = b_i/a_i</math>)</i> |                                     |                                      |                                                       |
| $d_1$                                                               | 0.13 $\mu\text{M}$                  | 0.065 $\mu\text{M}$                  | IP3                                                   |
| $d_2$                                                               | 1.049 $\mu\text{M}$                 | 0.52 $\mu\text{M}$                   | $\text{Ca}^{2+}$ (inhibition)                         |
| $d_3$                                                               | 943.4 nM                            | 471.7 nM                             | IP3                                                   |
| $d_4$                                                               | 144.5 nM                            | 72.2 nM                              | $\text{Ca}^{2+}$ (inhibition)                         |
| $d_5$                                                               | 82.34 nM                            | 41.2 nM                              | $\text{Ca}^{2+}$ (activation)                         |

**Table S1** Comparison of the parameters originally proposed to describe  $\text{Ca}^{2+}$  mobilization in Purkinje cells (De Young and Keizer, 1992) and the parameters used in the modeling of PAR1-induced  $\text{Ca}^{2+}$  mobilization in human platelets.
