# Supplementary material for: Mathematical model of PAR1-mediated activation of human platelets
Source: Royal Society of Chemistry journal article supplement (doi:10.1039/c0mb00250j), 2011-01-12
Supplement: c0mb00250ja.pdf [file c0mb00250ja.pdf]

Supplementary Material (ESI) for Molecular BioSystems  
This journal is (c) The Royal Society of Chemistry 2011

%%% L. Lenoci, M. Duvernay, S. Satchell, E. DiBenedetto and H.E. Hamm  
%%% Mathematical Model of PAR1-mediated Activation of Human Platelets  
%%% Manuscript ID MB-ART-10-2010-000250  
%%% MATLAB equation file

```
function dy=equazioni_new(t,y)

% read in data
[~,~,c1,c0,n_species,k,a1,a2,a3,a4,a5,b1,b2,b3,b4,b5,v1,v2,v3,k3,~,gtime,g,gg]=data_new;

% switches for knock-out experiments
[par1,gg,plc,pld_activity,gl2_l3,rho,ca,dag,pkc,pld,gi,pi3k,integrin,exocytosis,arf,pi5k,new_pkc,new_pld,akt] =switches;

dy=zeros(n_species,1); % column vector of the dy/dt

g = interp1(gtime,g,t);
gg = interp1(gtime,gg,t);

%%%%%%%%% activation of PAR1 %%%%%%%%%%%%%%%

if par1
dy(1)=-k(1)*y(1)*y(2)+k(2)*y(3)-k(3)*y(1); % PAR1-AP
dy(2)=-k(1)*y(1)*y(2)+k(2)*y(3); % PAR1
dy(3)=k(1)*y(1)*y(2)-k(2)*y(3)-k(7)*y(3); % PAR1*

end
%%%%%%%%% Gq protein cycle %%%%%%%%%%%%%%%

if gg
dy(3)=dy(3) -k(8)*y(3)*y(5)+k(9)*y(6) +k(14)*y(10)-k(15)*y(3)*y(11)*y(12); % PAR1*
dy(5)=-k(8)*y(3)*y(5)+k(9)*y(6);
dy(6)=k(8)*y(3)*y(5)-k(9)*y(6) -k(10)*y(6)+k(11)*y(7)*y(8);
dy(7)=k(10)*y(6)-k(11)*y(7)*y(8) -k(12)*y(7)*y(9)+k(13)*y(10);
dy(8)=k(10)*y(6)-k(11)*y(7)*y(8) ; % GDP
dy(9)=-k(12)*y(7)*y(9)+k(13)*y(10) ; % GTP
dy(10)=k(12)*y(7)*y(9)-k(13)*y(10) -k(14)*y(10)+k(15)*y(3)*y(11)*y(12);
dy(11)=k(14)*y(10)-k(15)*y(3)*y(11)*y(12)-k(16)*y(11) ; % GqGTP
dy(12)=k(14)*y(10)-k(15)*y(3)*y(11)*y(12) ; % beta_gamma
dy(13)=k(16)*y(11); % production of GqGDP

end

%%%%%%%%% PLCbeta activation and production of IP3 %%%%%%%%%%%%%%%
if plc
dy(11)=dy(11) -k(17)*y(14)*y(11)+k(18)*y(15);
dy(14)=-k(17)*y(14)*y(11)+k(18)*y(15) +k(20)*y(16)-k(21)*y(14)*y(13); % PLC_beta
dy(15)=k(17)*y(14)*y(11)-k(18)*y(15) -k(19)*y(15) -k(22)*y(15)*y(17)+k(23)*y(18) +k(24)*y(18);
```

```
dy(16)=k(19)*y(15) -k(20)*y(16)+k(21)*y(14)*y(13);
dy(13)=dy(13) +k(20)*y(16)-k(21)*y(14)*y(13);
dy(17)=-k(22)*y(15)*y(17)+k(23)*y(18) ; % PIP2
dy(18)=k(22)*y(15)*y(17)-k(23)*y(18) -k(24)*y(18);
dy(19)=k(24)*y(18) -k(25)*y(19) ; % IP3
end
%%%% DAG production %%%%%%%%%%%%%%
if dag
dy(44)=dy(19); % DAG = IP3
end
%%%% PLD activity %%%%%%%%%%%%%%
if pld_activity
dy(17)=dy(17) + g - k(46)*y(17); % g is PI5K*
dy(44)=dy(44) + gg - k(84)*y(44); % gg is PA
end
%%%% G12/13 cycle %%%%%%%%%%%%%%
if g12_13
dy(3)=dy(3) -k(26)*y(3)*y(20)+k(27)*y(21) + k(32)*y(23)-k(33)*y(3)*y(24)*y(12);
dy(20)=-k(26)*y(3)*y(20)+k(27)*y(21);
dy(21)=k(26)*y(3)*y(20)-k(27)*y(21) -k(28)*y(21)+k(29)*y(22)*y(8);
dy(22)=k(28)*y(21)-k(29)*y(22)*y(8) -k(30)*y(22)*y(9)+k(31)*y(23);
dy(8)=dy(8) + k(28)*y(21)-k(29)*y(22)*y(8) ;
dy(9)=dy(9) -k(30)*y(22)*y(9)+k(31)*y(23);
dy(23)=k(30)*y(22)*y(9)-k(31)*y(23) -k(32)*y(23) +k(33)*y(3)*y(24)*y(12);
dy(24)= k(32)*y(23)-k(33)*y(3)*y(24)*y(12) - k(34)*y(24) ; % G13GTP
dy(12)=dy(12) + k(32)*y(23)-k(33)*y(3)*y(24)*y(12);
dy(25)=k(34)*y(24) ; % G13GDP
end
%%%%%%%%%%%% Rho protein cycle %%%%%%%%%%%%%%
if rho
dy(26)=-k(35)*y(26)*y(24)+k(36)*y(27) +k(38)*y(28)-k(39)*y(26)*y(25);
dy(24)=dy(24) -k(35)*y(26)*y(24)+k(36)*y(27);
dy(27)=k(35)*y(26)*y(24)-k(36)*y(27) -k(37)*y(27) -k(40)*y(27)*y(29)+k(41)*y(30) +k(42)*y(30);
```

```

dy(28)=k(37)*y(27) -k(38)*y(28)+k(39)*y(26)*y(25);
dy(25)=dy(25) +k(38)*y(28)-k(39)*y(26)*y(25) ;
dy(29)=-k(40)*y(27)*y(29)+k(41)*y(30) +k(43)*y(31);
dy(30)= k(40)*y(27)*y(29)-k(41)*y(30) -k(42)*y(30);
dy(31)=k(42)*y(30) -k(43)*y(31); % RhoGTP
end
%%%%%%%%%%%%%%%%%%%%%%%%%%%%%%%%%%%%%%%%%%%%%%%%%%%%%%%%%%%%%%%%%%%%%%%%
if ca
dy(32)= - a5*y(40)*y(32) + b5*y(34)...
        - a4*y(40)*y(32) + b4*y(33)...
        - a1*y(19)*y(32) + b1*y(36);
dy(33)= -a5*y(40)*y(33) + b5*y(35)...
        -b4*y(33) + a4*y(40)*y(32)...
        -a3*y(19)*y(33) + b3*y(37);
dy(34)= -b5*y(34) + a5*y(40)*y(32)...
        -a4*y(40)*y(34) + b4*y(35)...
        -a1*y(19)*y(34) + b1*y(38);
dy(35)= -b5*y(35) + a5*y(40)*y(33)...
        -b4*y(35) + a4*y(40)*y(34)...
        -a3*y(19)*y(35) + b3*y(39);
dy(36)= -a5*y(40)*y(36) + b5*y(38)...
        -a2*y(40)*y(36) +b2*y(37)...
        -b1*y(36) + a1*y(19)*y(32);
dy(37)= -a5*y(40)*y(37) + b5*y(39)...
        -b2*y(37) + a2*y(40)*y(36)...
        -b3*y(37) + a3*y(19)*y(33);
dy(38)= -b5*y(38) + a5*y(40)*y(36)...
        -a2*y(40)*y(38) + b2*y(39)...
        -b1*y(38) + a1*y(19)*y(34);
dy(39)= -b5*y(39) + a5*y(40)*y(37)...
        -b2*y(39) + a2*y(40)*y(38)...
        -b3*y(39) + a3*y(19)*y(35);

dy(40)=c1*(v1*y(38)^3+v2)*( -y(40)+(c0-y(40))/c1)-((v3*y(40)^2)/(y(40)^2+k3^2)); % de young-keizer model
end
%%%%%%%%%%%%%%%%%%%%%%%%%%%%%%%%%%%%%%%%%%%%%%%%%%%%%%%%%%%%%%%%%%%%%%%%
if new_pkc
dy(40)=dy(40) -k(73)*y(43)*y(40)+k(74)*y(45) ;
dy(43)= -k(73)*y(43)*y(40)+k(74)*y(45) ; % PKC inactive
dy(45)= k(73)*y(43)*y(40)-k(74)*y(45) ; % PKC* by Ca

dy(44)=dy(44) -k(75)*y(43)*y(44)+k(76)*y(87) ;
dy(43)=dy(43) -k(75)*y(43)*y(44)+k(76)*y(87) ; % PKC inactive
    
```

```
dy(87)=          k(75)*y(43)*y(44)-k(76)*y(87);  % PKC* by DAG
end

##### PLD module #####

if new_pld

dy(45)=dy(45)  -k(77)*y(45)*y(46)+k(78)*y(88);
dy(46)=          -k(77)*y(45)*y(46)+k(78)*y(88);  % PLD inactive
dy(88)=          k(77)*y(45)*y(46)-k(78)*y(88);  % PLD* by PKC-Ca

dy(87)=dy(87)  -k(79)*y(87)*y(46)+k(80)*y(89);
dy(46)=dy(46)  -k(79)*y(87)*y(46)+k(80)*y(89);
dy(89)=          k(79)*y(87)*y(46)-k(80)*y(89);  %PLD* by PKC-DAG

dy(17)=dy(17)  -k(81)*y(17)*y(46)+k(82)*y(90);
dy(46)=dy(46)  -k(81)*y(17)*y(46)+k(82)*y(90);
dy(90)=          k(81)*y(17)*y(46)-k(82)*y(90);  % PLD* by PIP2

end

##### Gi cycle #####

if gi

dy(3)=dy(3)  -k(92)*y(3)*y(48)+k(93)*y(49)    +k(98)*y(51)-k(99)*y(3)*y(52)*y(12);
dy(48)=          -k(92)*y(3)*y(48)+k(93)*y(49);
dy(49)=          k(92)*y(3)*y(48)-k(93)*y(49)    -k(94)*y(49)+k(95)*y(50)*y(8);
dy(8)=dy(8)  +k(94)*y(49)-k(95)*y(50)*y(8);

dy(50)=          k(94)*y(49)-k(95)*y(50)*y(8)    -k(96)*y(50)*y(9)+k(97)*y(51);
dy(9)=dy(9)  -k(96)*y(50)*y(9)+k(97)*y(51);
dy(51)=          k(96)*y(50)*y(9)-k(97)*y(51)    -k(98)*y(51)+k(99)*y(3)*y(52)*y(12);
dy(52)= k(98)*y(51)-k(99)*y(3)*y(52)*y(12)    -k(100)*y(52)    ;  % GiGTP
dy(12)=dy(12) +k(98)*y(51)-k(99)*y(3)*y(52)*y(12) ;  % beta_gamma
dy(53)=k(100)*y(52) ;  % GiGDP

end

##### PI3K module #####

if pi3k

dy(12)=dy(12)  -k(65)*y(12)*y(77)+k(66)*y(78);  % beta_gamma
dy(77)=          -k(65)*y(12)*y(77)+k(66)*y(78);  % PI3K
dy(78)=          k(65)*y(12)*y(77)-k(66)*y(78)    -k(67)*y(78)*y(17)+k(68)*y(79);  %PI3K*
dy(17)=dy(17)  -k(67)*y(78)*y(17)+k(68)*y(79);
dy(79)=          k(67)*y(78)*y(17)-k(68)*y(79);  % PIP3

end

##### Integrin activation module #####

if integrin
```

```
dy(54)= -k(51)*y(54)*y(44)*y(40)+k(52)*y(55);
dy(44)=dy(44) -k(51)*y(54)*y(44)*y(40)+k(52)*y(55);
dy(40)=dy(40) -k(51)*y(54)*y(44)*y(40)+k(52)*y(55);
dy(55)= k(51)*y(54)*y(44)*y(40)-k(52)*y(55) -k(101)*y(55)*y(56)+k(102)*y(57) +k(103)*y(57); % RapGEF*
dy(56)=-k(101)*y(55)*y(56)+k(102)*y(57) +k(104)*y(58); % Rap1GDP
dy(57)= k(101)*y(55)*y(56)-k(102)*y(57) -k(103)*y(57);
dy(58)=k(103)*y(57) -k(104)*y(58) -k(53)*y(58)*y(59)+k(54)*y(60); % Rap1GTP

dy(59)=-k(53)*y(58)*y(59)+k(54)*y(60); % RIAM
dy(60)=k(53)*y(58)*y(59)-k(54)*y(60) -k(55)*y(60)*y(61)+k(56)*y(62);
dy(61)=-k(55)*y(60)*y(61)+k(56)*y(62); % TALIN
dy(62)=k(55)*y(60)*y(61)-k(56)*y(62) -k(57)*y(62)*y(63)+k(58)*y(64);
dy(63)=-k(57)*y(62)*y(63)+k(58)*y(64); % Integrin
dy(64)=k(57)*y(62)*y(63)-k(58)*y(64); % Integrin*

end

%%%%%%%%%%%%%%%%%%%%%%%%%%%%%%%%%%%%%%%%%%%%%%%%%%%%%%%%%%%%%%%%%%%%%%%% Akt module %%%%%%%%%%%%%%%%%%%%%%%%%%%%%%%%%%%%%%%%%%%%%%%%%%%%%%%%%%%%%%%%%%%%%%%%%

if akt

dy(12)=dy(12) -k(85)*y(12)*y(91) + k(86)*y(92); % beta_gamma
dy(91)= -k(85)*y(12)*y(91) + k(86)*y(92); %Akt
dy(92)= +k(85)*y(12)*y(91) - k(86)*y(92) -k(87)*y(56)*y(92) + k(88)*y(93); %Akt*
dy(56)=dy(56) -k(87)*y(56)*y(92) + k(88)*y(93); %Rap1GDP
dy(93)= +k(87)*y(56)*y(92) - k(88)*y(93); % Rap1GTP_Akt

end

%%%%%%%%%%%%%%%%%%%%%%%%%%%%%%%%%%%%%%%%%%%%%%%%%%%%%%%%%%%%%%%%%%%%%%%% Simplified exocytosis module %%%%%%%%%%%%%%%%%%%%%%%%%%%%%%%%%%%%%%%%%%%%%%%%%%%%%%%%%%%%%%%%%%%%%%%%%
dy(94)=k(89)*y(40)*y(45)*exp(-k(91)*t)-k(90)*y(94);

return
```
